# Supplementary material for: Enhancing switchable dielectric property for crystalline supramolecular rotor compounds by adding polar components
Source: Royal Society of Chemistry journal article supplement (doi:10.1039/d0cc01026j), 2020-01-01
Supplement: d0cc01026j1.pdf [file d0cc01026j1.pdf]

## Electronic Supplementary Material for

# **Enhancing switchable dielectric property for crystalline supramolecular rotor compounds by adding polar component**

Rui-Kang Huang, Xiao-Xian Chen, Zhi-Feng Xiao, De-Xuan Liu, Wei-Xiong Zhang\* and Xiao-Ming Chen

*MOE Key Laboratory of Bioinorganic and Synthetic Chemistry, School of Chemistry, Sun Yat-Sen University, Guangzhou 510275, China*

E-mail: [zhangwx6@mail.sysu.edu.cn](mailto:zhangwx6@mail.sysu.edu.cn)

## Experimental details.

**Materials and General Methods.** Reagents and solvents were commercially available and used without further purification. Thermogravimetric analysis was performed using a TA-Q50 system.

**Synthesis** of [(HMNA)(18C6)]PF<sub>6</sub> (**1P**): Equivalent 68% HPF<sub>6</sub> aqueous solution was added to the mixed ethanol solution of 18C6 and MNA by drops. The mixed solution was evaporated in air. After 1 week, colourless block-like crystals of **1P** were filtered and washed by ethanol, then dried in air (yield: *ca.* 65%).

**Synthesis** of [(HMNA)(18C6)]SO<sub>3</sub>CF<sub>3</sub> (**1S**): Equivalent HSO<sub>3</sub>CF<sub>3</sub> was added to the mixed ethanol solution of 18C6 and MNA by drops. The mixed solution was evaporated in air. After 3 days, colourless block-like crystals of **1S** were filtered and washed by ethanol, then dried in air (yield: *ca.* 80%).

**Crystal Structure Determination.** Single-crystal diffraction data of **1P**-RT, **1P**-LT, **1S**-RT and **1S**-LT were collected on a Rigaku XtaLAB P300DS single-crystal diffractometer equipped with a graphite-monochromated Cu K $\alpha$  radiation ( $\lambda = 1.54178 \text{ \AA}$ ), respectively. The structures were solved with the direct methods and refined with a full-matrix least-squares technique with the *SHELX* program package. Anisotropic thermal parameters were applied to all non-hydrogen atoms. The hydrogen atoms were positioned geometrically and included in the refinement. Crystallographic data and refinements for the complexes are summarized in **Table S1**. CCDC numbers: 1982636-1982639 for **1P**-RT, **1P**-LT, **1S**-RT and **1S**-LT, respectively.

**Differential scanning calorimeter (DSC).** The DSC measurements were performed by heating/cooling the powder sample sealed in aluminum crucibles at a rate of 10 K min<sup>-1</sup> on a TA DSC Q2000 instrument. The value of  $N$  is estimated by the Boltzmann equation,  $\Delta S = R \ln N$ , where  $R$  is the gas constant,  $N$  represents the ratio of the numbers of state. The value of  $\Delta S$  calculated by its definition,  $\Delta S = \Delta Q/T_c$ , where the value of  $\Delta Q$  is integrated from DSC results by TA *Universal Analysis* and the value of  $T_c$  is the phase-transition temperature.

**Dielectric measurement.** The dielectric measurements were carried on a TH2838 impedance analyzer at 10 different frequencies from 5 kHz to 200 kHz, with an amplitude of 1.0 V, and a temperature sweeping rate of *ca.* 3 K min<sup>-1</sup> in a Mercury iTC cryogenic environment controller of Oxford Instrument. Pellets with 5 mm in diameter and 0.2–0.9 mm thick were prepared by pressing microcrystal samples at 780 MPa. Silver conduction paste deposited on the surface of pressed-powder pellets was used as the electrodes.

**Hirshfeld surfaces analysis.** Hirshfeld surfaces and the related 2D-fingerprint plots were calculated with high resolution by *CrystalExplorer* with inputting structure file in CIF format. The Bond lengths related to hydrogen atoms were set to typical neutron values (C–H = 1.083 Å, N–H = 1.009 Å and O–H = 0.983 Å, respectively).

**Table S1.** Crystallographic parameters for **1P-RT**, **1P-LT**, **1S-RT** and **1S-LT**.

| Compound                                                         | [(MNA)(18C6)]PF <sub>6</sub> ( <b>1P</b> )                                     |              | [(MNA)(18C6)]SO <sub>3</sub> CF <sub>3</sub> ( <b>1S</b> )                      |                         |
|------------------------------------------------------------------|--------------------------------------------------------------------------------|--------------|---------------------------------------------------------------------------------|-------------------------|
| Formula                                                          | C <sub>19</sub> H <sub>33</sub> F <sub>6</sub> N <sub>2</sub> O <sub>9</sub> P |              | C <sub>20</sub> H <sub>33</sub> F <sub>3</sub> N <sub>2</sub> O <sub>12</sub> S |                         |
| Formula weight                                                   | 578.44                                                                         |              | 582.54                                                                          |                         |
| Phase                                                            | <b>1P-RT</b>                                                                   | <b>1P-LT</b> | <b>1S-RT</b>                                                                    | <b>1S-LT</b>            |
| <i>T</i> / K                                                     | 298(2)                                                                         | 213(2)       | 298(2)                                                                          | 213(2)                  |
| Crystal system                                                   | Orthorhombic                                                                   | Orthorhombic | Monoclinic                                                                      | Monoclinic              |
| Space group                                                      | Pccn                                                                           | Pccn         | <i>P2<sub>1</sub>/c</i>                                                         | <i>P2<sub>1</sub>/c</i> |
| <i>a</i> / Å                                                     | 17.7788(4)                                                                     | 16.774(3)    | 10.0129(3)                                                                      | 20.31807(19)            |
| <i>b</i> / Å                                                     | 19.7210(3)                                                                     | 20.000(3)    | 18.4433(5)                                                                      | 17.85897(16)            |
| <i>c</i> / Å                                                     | 15.0786(2)                                                                     | 15.122(3)    | 14.9448(3)                                                                      | 14.64020(12)            |
| <i>β</i> / °                                                     | 90                                                                             | 90           | 98.440(2)                                                                       | 96.2560(10)             |
| <i>V</i> / Å <sup>3</sup>                                        | 5286.79(16)                                                                    | 5073.0(15)   | 2729.98(13)                                                                     | 5280.70(8)              |
| <i>Z</i>                                                         | 8                                                                              | 8            | 4                                                                               | 8                       |
| <i>D<sub>c</sub></i> / g·cm <sup>-3</sup>                        | 1.453                                                                          | 1.515        | 1.417                                                                           | 1.465                   |
| <i>R</i> <sub>int</sub>                                          | 0.0858                                                                         | 0.0422       | 0.0531                                                                          | 0.0228                  |
| <i>R</i> <sub>1</sub> [ <i>I</i> > 2σ( <i>I</i> )] <sup>a</sup>  | 0.0867                                                                         | 0.0536       | 0.0685                                                                          | 0.0448                  |
| <i>wR</i> <sub>2</sub> [ <i>I</i> > 2σ( <i>I</i> )] <sup>b</sup> | 0.2941                                                                         | 0.1531       | 0.2038                                                                          | 0.1223                  |
| <i>R</i> <sub>1</sub> (all data)                                 | 0.0988                                                                         | 0.0560       | 0.0741                                                                          | 0.0496                  |
| <i>wR</i> <sub>2</sub> (all data)                                | 0.3198                                                                         | 0.1568       | 0.2110                                                                          | 0.1282                  |
| GOF                                                              | 1.009                                                                          | 1.098        | 1.081                                                                           | 1.032                   |

$$^a R_1 = |F_o| - |F_c|/|F_o|, \quad ^b wR_2 = \{w[(F_o)^2 - (F_c)^2]/w[(F_o)^2]\}^{1/2}$$

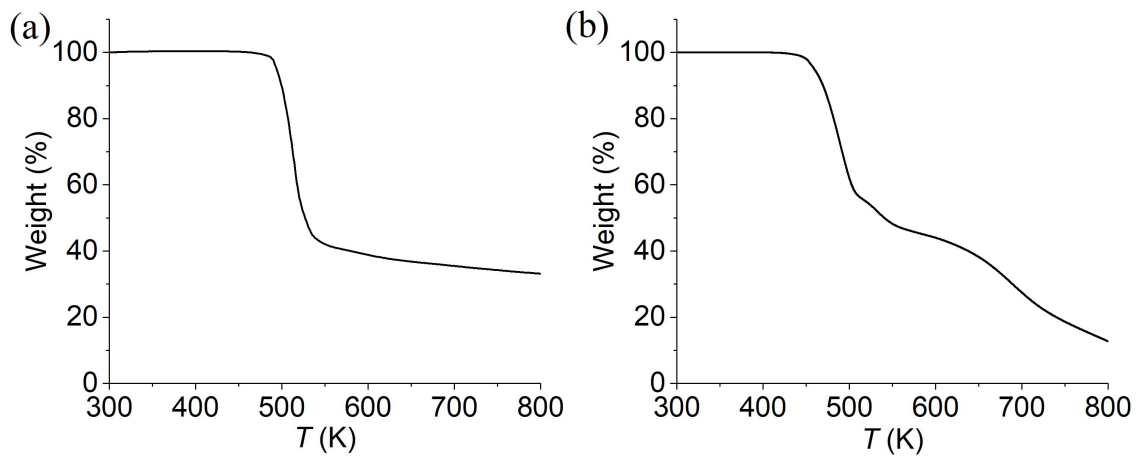

**Figure S1.** TG curves of **1P** (a) and **1S** (b).

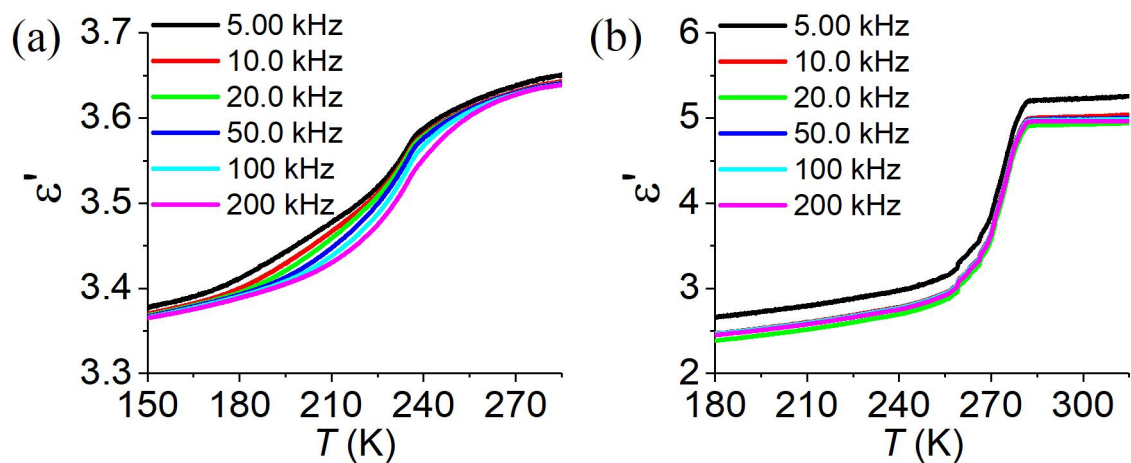

**Figure S2.** Temperature dependence of dielectric constant ( $\epsilon'$ ) for **1P** (a) and **1S** (b).

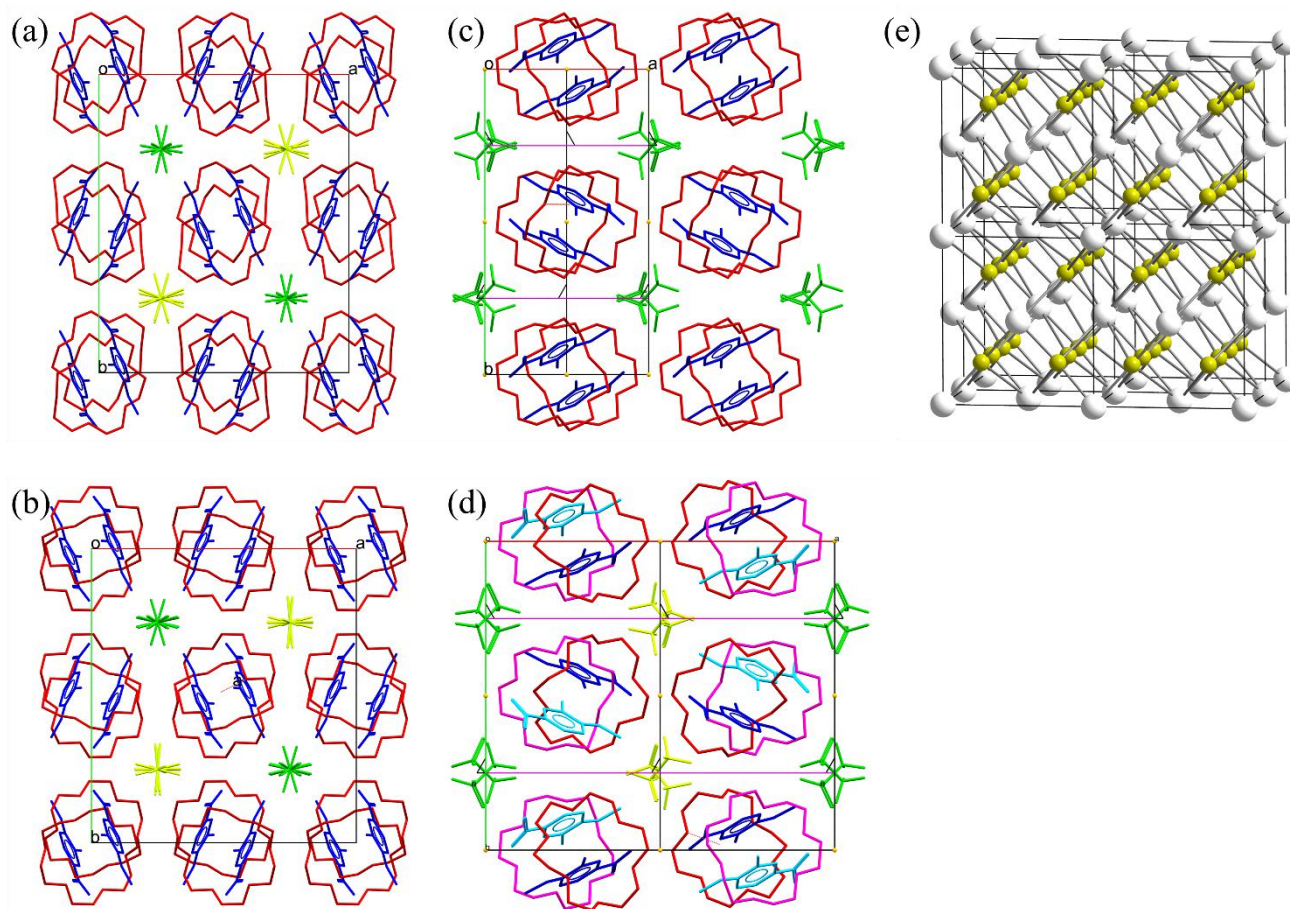

**Figure S3.** The packing modes of **1P-RT** (a), **1P-LT** (b), **1S-RT** (c) and **1S-LT** (d), and the topological connectivity (e) of dimer units (white spheres) and  $\text{PF}_6^-$  anions (yellow spheres). Different symmetry equivalences are distinguished with different colour:  $\text{HMNA}^+$  mapped with blue or cyan,  $18\text{C}6$  mapped with red or pink, counter anion mapped with green or yellow.

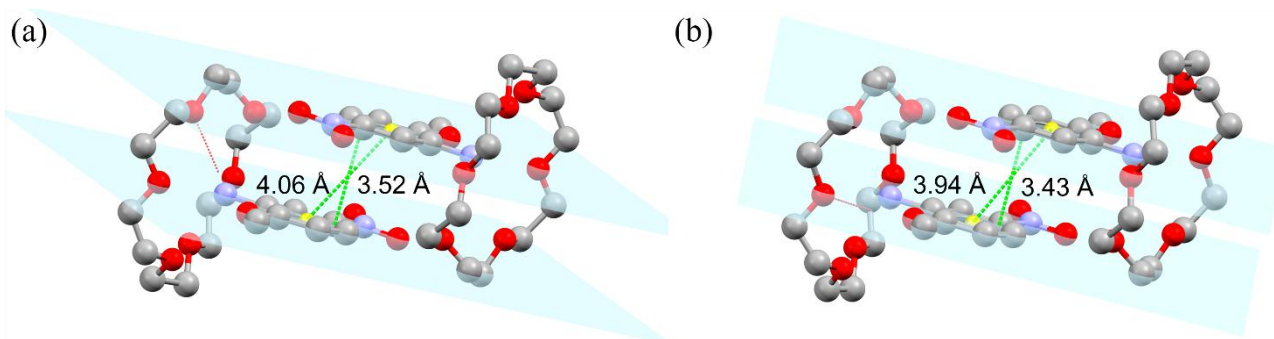

**Figure S4.** The supramolecular interactions between two  $[(\text{HMNA})(18\text{C}6)]^+$  cations in **1P-RT** (a) and **1S-RT** (b).

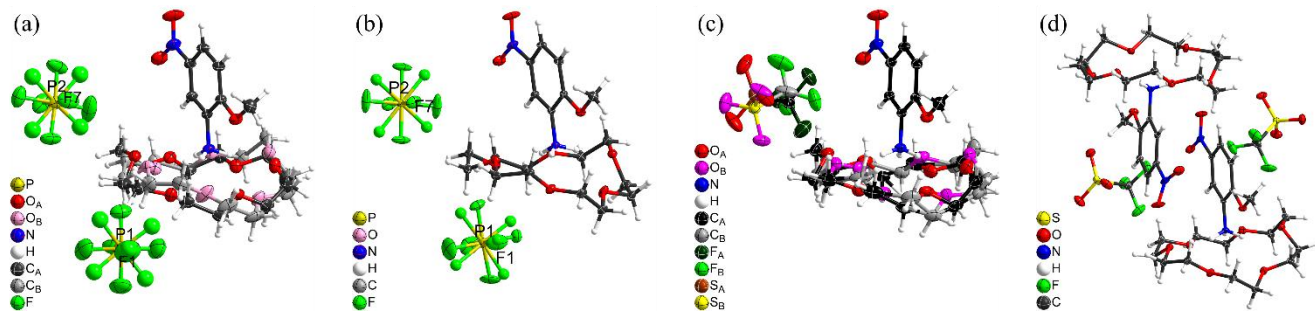

**Figure S5.** The asymmetry units of **1P-RT** (a), **1S-RT** (b), **1P-LT** (c), and **1S-LT** (d).

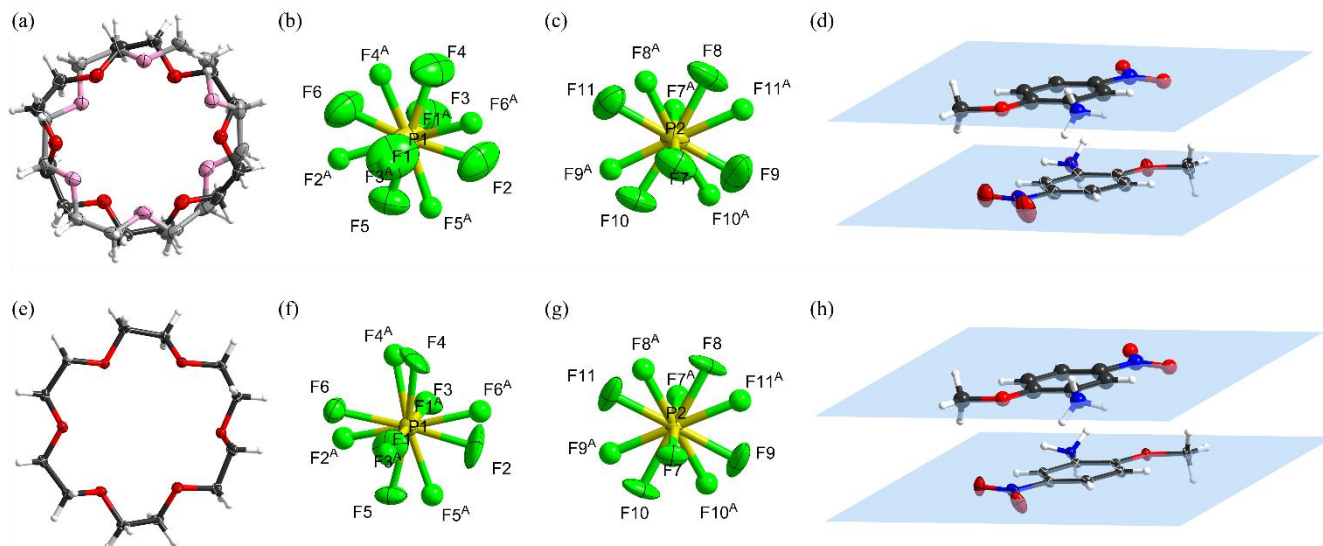

**Figure S6.** The structure details of **18C6** (a, e),  $\text{PF}_6^-$  anion (b, c, f and g), and  $\text{HMNA}^+$  cation (d, h) in **1P-RT** (up row) and **1P-LT** (down row).

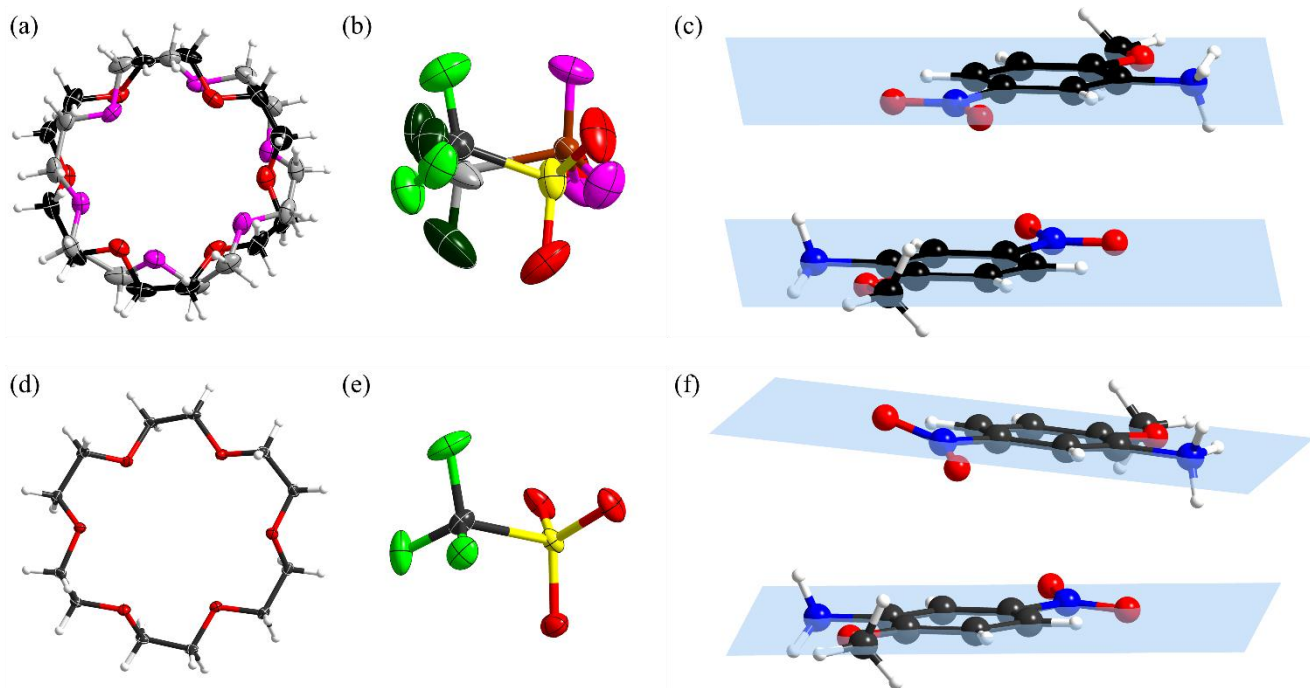

**Figure S7.** The structure details of 18C6 molecule (a, d), SO<sub>3</sub>CF<sub>3</sub><sup>-</sup> anion (b, e), and HMNA<sup>+</sup> cation (c, f) in 1S-RT (up row) and 1S-LT (down row).

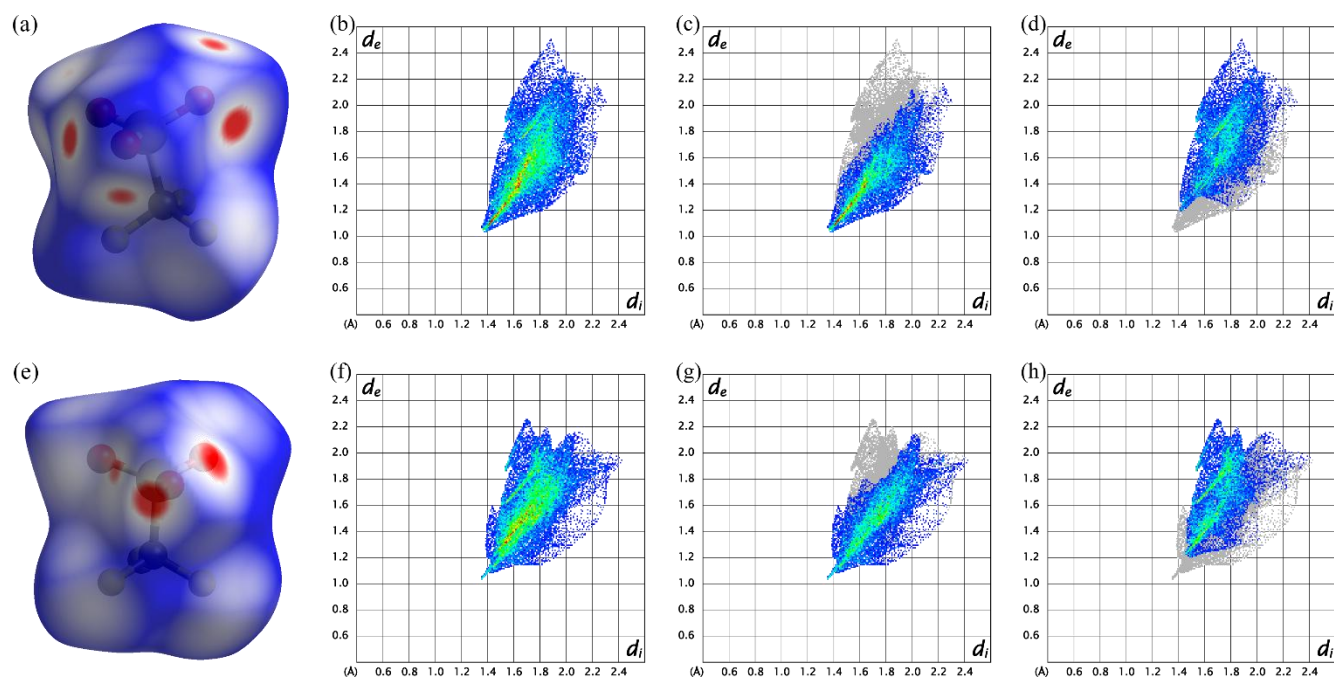

**Figure S8.** The Hirshfeld surfaces of SO<sub>3</sub>CF<sub>3</sub><sup>-</sup> anions (a, e). The 2D-fingerprint plots of SO<sub>3</sub>CF<sub>3</sub><sup>-</sup> anions for contacts between all interior atoms (b, f), O atoms (c, g) and F atoms (d, h) to all exterior atoms of the Hirshfeld surfaces.

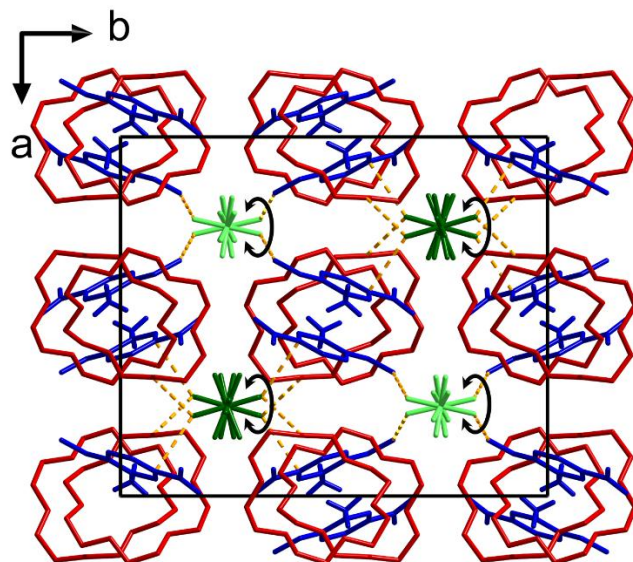

**Figure S9.** The supramolecular interactions between rotate axis of the  $\text{PF}_6^-$  anion and the dimer unit.

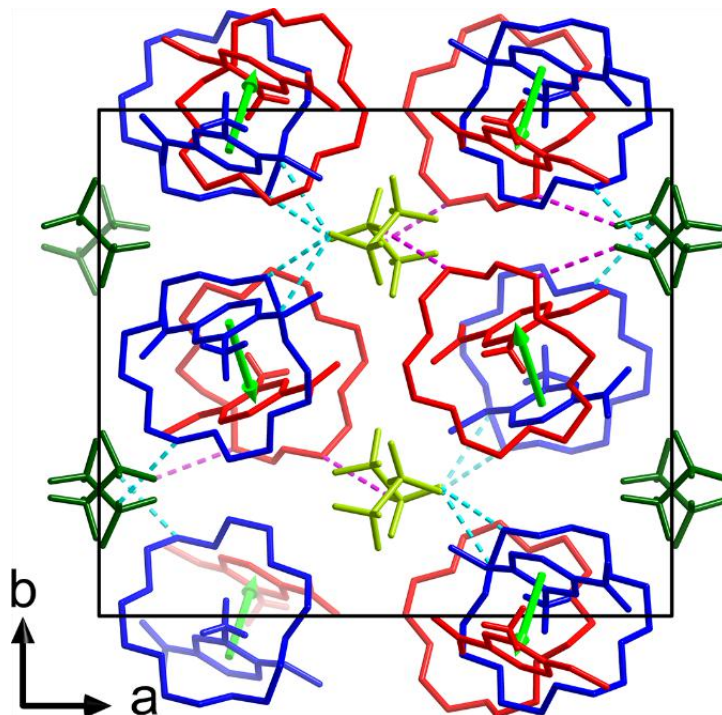

**Figure S10.** The direction and packing of asymmetry dimer unit.
